# Supplementary material
Source: Springer Nature journal article supplement (https://www.springermedizin.de/resource/supplementary/13023_2006_56_MOESM4_ESM.pdf/9641638)

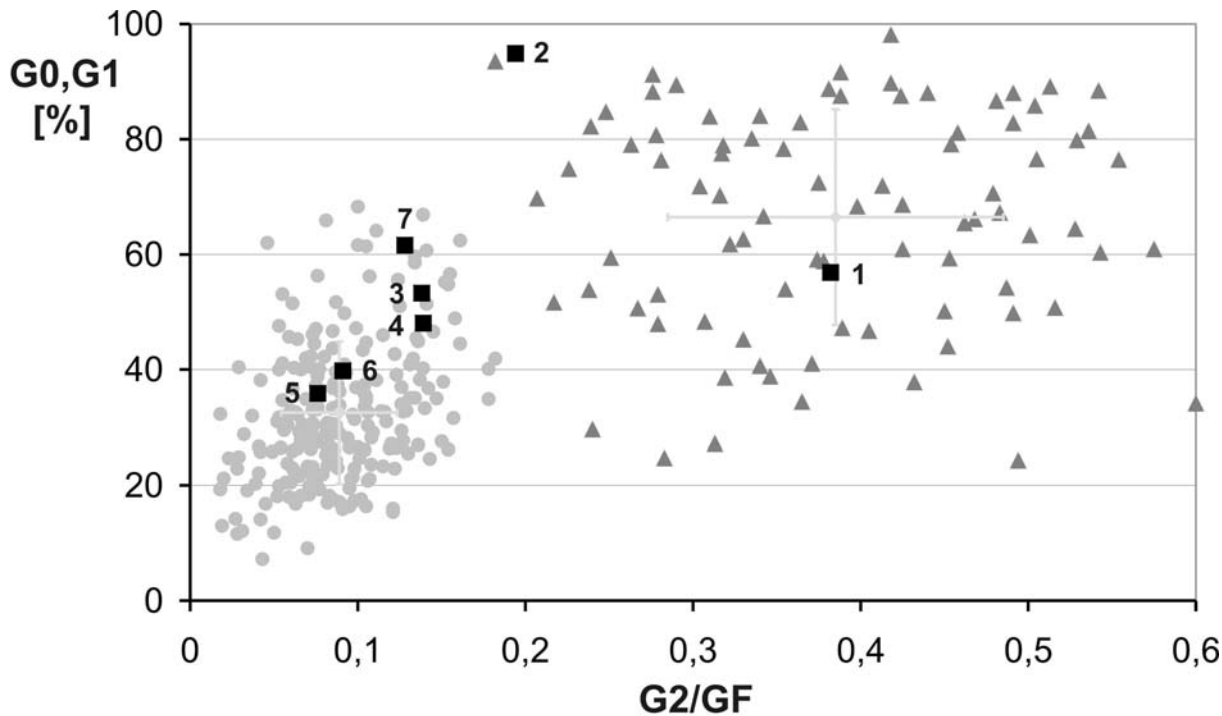

● CON

▲ AT

■ PAT

1: Dec 2001

2: Jun 2002

3: Nov 2002

4: Mar 2003

5: Nov 2003

6: Mar 2004

7: Sep 2004

Supplement: MOESM4 [file 9641638]
